# Supplementary material
Source: publisher figshare collection journal article supplement (https://acs.figshare.com/ndownloader/files/5796003)
Supplement: Supplementary file 1 [file 5796003]

#### Terms & Conditions

Electronic Supporting Information files are available without a subscription to ACS Web Editions. The American Chemical Society holds a copyright ownership interest in any copyrightable Supporting Information. Files available from the ACS website may be downloaded for personal use only. Users are not otherwise permitted to reproduce, republish, redistribute, or sell any Supporting Information from the ACS website, either in whole or in part, in either machine-readable form or any other form without permission from the American Chemical Society. For permission to reproduce, republish and redistribute this material, requesters must process their own requests via the RightsLink permission system. Information about how to use the RightsLink permission system can be found at <http://pubs.acs.org/page/copyright/permissions.html>

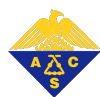

ACS Publications

MOST TRUSTED. MOST CITED. MOST READ.

Copyright © 1997 American Chemical Society

## Experimental Procedures

### 2-(*o*-Nitrobenzenesulfonyl)-2-azabicyclo[2.2.1]hept-5-en-3-one (3a)

To a solution of 2-azabicyclo[2.2.1]hept-5-en-3-one (**2**) (1.09 g, 10 mmol) in THF (31 ml) at  $-78^{\circ}\text{C}$  was added BuLi-n-hexane solution (1.56 M) (6.41 ml, 10 mmol of BuLi) under Ar atmosphere with stirring. The mixture was stirred for 30 min at the same temperature. To the resulting solution was added a solution of *o*-nitrobenzenesulfonyl chloride (2.44 g, 11 mmol) in THF (4 ml) during the period of 1 h at  $-75$ — $-70^{\circ}\text{C}$  with stirring. After being stirred for 2 h at  $-75^{\circ}\text{C}$ , the reaction mixture was neutralized with AcOH (0.12 g, 2 mmol). The mixture was diluted with toluene (50 ml), washed with 10% brine (50 ml), and dried over  $\text{MgSO}_4$ . The solvent was removed *in vacuo* to give 2.44 g (83%) of **3a**, mp  $94^{\circ}\text{C}$  (from AcOEt—hexane); exact mass (EI) calcd for  $(\text{C}_{12}\text{H}_{10}\text{N}_2\text{O}_5\text{S}+\text{H})^+$  295.0389, found 295.0353.

### 2-(Diphenylphosphoryl)-2-azabicyclo[2.2.1]hept-5-en-3-one (3b)

To a solution of **2** (1.05 g, 9.6 mmol) in THF (20 ml) was added BuLi-n-hexane solution (1.56 M) (6.73 ml, 10.5 mmol of BuLi) at  $-78^{\circ}\text{C}$  with stirring. The mixture was stirred for 30 min at the same temperature. The resulting solution was added to a solution of diphenyl chlorophosphate (2.17 ml, 10.5 mmol) in THF (10 ml) with stirring under ice-cooling. The mixture was stirred under ice-cooling for 5 min. To the resulting reaction mixture was added saturated aqueous  $\text{NH}_4\text{Cl}$  solution. The mixture was extracted with EtOAc, and the organic layer was dried over  $\text{MgSO}_4$ . After evaporation of the solvent *in vacuo*, the residue was submitted to silica gel column chromatography. Elution with hexane-EtOAc (3:1) afforded a crystalline substance, which was purified by recrystallization from hexane-EtOAc to give 2.12 g (88%) of **3b**, mp  $51^{\circ}\text{C}$ , exact mass (EI) calcd for  $(\text{C}_{18}\text{H}_{16}\text{NO}_4\text{P})^+$  341.0817, found 341.0825.

### 6-Chloro-9-[*c*-4-(*N*-*o*-nitrobenzenesulfonyl)carbamoyl-cyclopent-2-en-*r*-1-yl]-9*H*-purine (6)

To a solution of  $\text{Pd}[\text{P}(\text{O}^i\text{Pr})_3]_4$  (0.1 mmol) prepared from  $\text{Pd}(\text{OAc})_2$  (22.4 mg, 0.1 mmol) and  $\text{P}(\text{O}^i\text{Pr})_3$  (0.148 ml, 0.6 mmol) in THF (5 ml) was added a solution of 6-chloropurine tetrabutylammonium salt (395 mg, 1 mmol) in THF (5 ml) and a solution of **3a** (294 mg, 1 mmol) in THF (5 ml) with stirring at room temperature. The mixture was stirred for 2.5 h at room

temperature. After removal of the solvent *in vacuo*, the residue was submitted to silica gel column chromatography. Elution with  $\text{CHCl}_3$ -*iso*-PrOH-AcOH (10:1:0.1) gave 267 mg (60%) of **6**, mp  $212^\circ\text{C}$  (from  $\text{CHCl}_3$ -MeOH), exact mass (EI) calcd for  $(\text{C}_{17}\text{H}_{13}\text{ClN}_6\text{O}_5\text{S})^+$  448.0356, found 448.0360.

**6-Chloro-9-[c-4-(N-diphenylphosphoryl)carbamoylcyclopent-2-en-r-1-yl]-9H-purine (7)**

To a suspension of NaH (60% oil dispersion) (22 mg, 0.55 mmol) in N-methylpyrrolidone (NMP) (1 ml) was added a solution of 6-chloropurine (85 mg, 0.55 mmol) in NMP (1 ml) at  $0^\circ\text{C}$  with stirring. After being stirred for 1 h at  $60^\circ\text{C}$ , to the solution were added a solution of  $\text{Pd}(\text{OAc})_2$  (11 mg, 0.05 mmol) in THF (0.5 ml),  $\text{P}(\text{O}^i\text{Pr})_3$  (0.074 ml, 0.3 mmol), and a solution of **3b** (63 mg, 0.5 mmol) in NMP (1 ml) with stirring under ice-cooling, successively. After being stirred at room temperature for 1 h, the resulting mixture was neutralized with AcOH. After evaporation of the solvent *in vacuo*, the residue was submitted to silica gel column chromatography. Elution with hexane-EtOAc (1:5) afforded 137 mg (55%) of **7**. mp  $187^\circ\text{C}$  (from EtOAc); exact mass (EI) calcd for  $(\text{C}_{23}\text{H}_{19}\text{ClN}_5\text{O}_4\text{P})^+$  495.0863, found 495.0870.

**6-Chloro-2-formylamino-6-Chloro-9-[c-4-(N-o-nitrobenzenesulfonyl)carbamoylcyclopent-2-en-r-1-yl]-9H-purine (8)**

To a solution of 2-formylamino-6-chloropurine tetrabutylammonium salt (2.63 g, 6.0 mmol) in THF (20 ml) was added  $\text{Pd}(\text{OAc})_2$  (56.0 mg, 0.25 mmol), and  $\text{P}(\text{O}^i\text{Pr})_3$  (360 mg, 1.73 mmol), successively. After being stirred at  $50^\circ\text{C}$  for 30 min, to the mixture was added a solution of **3a** (1.47 g, 5.0 mmol) in THF (5 ml) during the period of 2 h at room temperature. After being stirred for 1 h at room temperature, the mixture was neutralized with AcOH, and concentrated *in vacuo* to give a residue, which was submitted to silica gel column chromatography. Elution with  $\text{CHCl}_3$ -MeOH (15:1) afforded 1.36 g (55%) of **8**. mp  $218$ - $220^\circ\text{C}$  (dec.) (from  $\text{CHCl}_3$ -MeOH); exact mass (EI) calcd for  $(\text{C}_{18}\text{H}_{14}\text{ClN}_7\text{O}_6\text{S})^+$  491.0415, found 491.0420.

**6-Chloro-9-[c-4-(N-methyl-N-o-nitrobenzenesulfonyl)carbamoylcyclopent-2-en-r-1-yl]-9H-purine (10)**

To a solution of **6** (30 mg, 0.067 mmol) in THF- $\text{CH}_2\text{Cl}_2$  (1:1) (2 ml) was added MeOH (8.0  $\mu\text{l}$ , 0.20 mmol),  $\text{PPh}_3$  (53 mg, 0.20 mmol), and diethyl azodicarboxylate (90%, 0.036 ml, 0.21 mmol) under Ar atmosphere with stirring at room temperature. After being stirred

for 30 min, the solvent was evaporated *in vacuo* to give a crystalline residue, which was submitted to silica gel column chromatography. Elution with hexane-EtOAc (1:2) gave 30 mg (97%) of **10**. mp 215-217°C (from hexane-AcOEt-CHCl<sub>3</sub>): <sup>1</sup>HNMR (CDCl<sub>3</sub>, 300 MHz) δ 2.30 (dt, J=3.71, 14.56 Hz, 1H), 2.99 (dt, J=9.07, 14.56 Hz, 1H), 4.20-4.27 (m, 1H), 5.85-5.93 (m, 1H), 6.08 (dt, J=2.20, 5.77 Hz, 1H), 6.30 (dt, J=2.20, 5.22 Hz, 1H), 7.74-7.88 (m, 3H), 8.09 (s, 1H), 8.34-8.41 (m, 1H), 8.73 (s, 1H); exact mass (EI) calcd for (C<sub>18</sub>H<sub>15</sub>ClN<sub>6</sub>O<sub>5</sub>S)<sup>+</sup> 462.0513, found 462.0532.

**6-Chloro-9-(c-4-hydroxymethylcyclopent-2-en-r-1-yl)-9H-purine (11)**

To a solution of **10** (30 mg, 0.065 mmol) in MeOH (2 ml) was added NaBH<sub>4</sub> (25 mg, 0.66 mmol) under ice-cooling with stirring. The mixture was stirred at room temperature for 5 min, and neutralized with AcOH. After evaporation of the solvent, the residue was submitted to silica gel column chromatography. Elution with AcOEt gave 15 mg (92%) of **11** and 13 mg (93%) of **12**. **11**: <sup>1</sup>HNMR (CDCl<sub>3</sub>, 300 MHz) δ 1.96 (dt, J=5.22, 14.29 Hz, 1H), 2.91 (dt, J=9.20, 14.29 Hz, 1H), 3.10-3.20 (m, 1H), 3.74 (dd, J=4.26, 10.58 Hz, 1H), 3.89 (dd, J=4.26, 10.58 Hz, 1H), 5.77-5.86 (m, 1H), 5.92 (dt, J=2.27, 5.77 Hz, 1H), 6.25 (dt, J=2.06, 5.77 Hz, 1H), 8.34 (s, 1H), 8.75 (s, 1H). **12**: <sup>1</sup>HNMR (CDCl<sub>3</sub>, 300 MHz) δ 2.80 (d, J=5.22 Hz, 1H), 5.19-5.29 (m, 1H), 7.72-7.81 (m, 2H), 7.84-7.93 (m, 1H), 8.11-8.19 (m, 1H).

**2-Amino-6-chloro-9-(c-4-hydroxymethylcyclopent-2-en-r-1-yl)-9H-purine (15)**

To a suspension of NaH (60% oil dispersion)(0.44 g, 11 mmol) in THF (50 ml) was added **8** (2.46 g, 5.0 mmol) portionwise under ice-cooling with stirring. After being stirred with ice-cooling for 1 h, to the mixture was added di-*tert*-butyl dicarbonate (2.18 g, 10.0 mmol). The resulting mixture was stirred for 2 h at room temperature, and then stirred for 3 h at 50°C. After cooling, methyl iodide (7.1 g, 50 mmol) was added to the mixture. The reaction mixture was stirred overnight at room temperature, and poured into water. The resulting mixture was extracted with AcOEt. The organic layer was washed with saturated brine, dried over anhydrous MgSO<sub>4</sub>, and condensed *in vacuo* to give 2.90 g of **13**. Without further purification, the crude **13** was used for the next reaction. To a solution of crude **13** in MeOH (100 ml) was added NaBH<sub>4</sub> (0.19 g, 5.0 mmol) portionwise with stirring at -20°C. During this period, the internal temperature was kept below 0°C. The mixture was then stirred at room temperature for 8 h. After the reaction mixture was neutralized with 5% H<sub>2</sub>SO<sub>4</sub>, the solvent was evaporated off *in vacuo*. To the residue was added

water. The mixture was extracted with AcOEt. The extract was dried over  $\text{MgSO}_4$ , and condensed *in vacuo* to give 2.8 g of **14**. Without further purification, the crude **14** was used for the next reaction. The crude **14** was dissolved in 90% aqueous AcOH (10 ml). The solution was heated at 50°C for 8 h. After removal of the solvent, the residue was submitted to silica gel column chromatography. Elution with  $\text{CHCl}_3$ -MeOH (40:1) afforded 0.96 g (72% from **8**) of **15**. mp 160-162°C (lit.<sup>2a</sup> mp 145-147°C for  $\text{C}_{11}\text{H}_{12}\text{ClN}_5\text{O}\cdot 3/4 \text{H}_2\text{O}$ );  $^1\text{H}$ NMR (DMSO- $d_6$ , 300 MHz)  $\delta$  1.88 (dt,  $J=13.7, 5.5$  Hz, 1H), 2.62 (dt,  $J=13.7, 8.8$  Hz, 1H), 2.87 (m, 1H), 3.44 (m, 2H), 4.78 (t,  $J=5.2$  Hz, 1H), 5.44 (m, 1H), 5.89 (m, 1H), 6.13 (m, 1H), 6.86 (brs, 2H), 7.38 (d,  $J=8.0$  Hz, 2H), 7.78 (d,  $J=8.0$  Hz, 2H), 8.02 (s, 1H);  $^{13}\text{C}$ NMR (DMSO- $d_6$ , 75 MHz)  $\delta$  160.0, 154.0, 149.7, 141.6, 139.2, 129.6, 123.9, 64.1, 59.5, 48.1, 34.3.

chiku NBS-ABH

expi stdin

SAMPLE DEC. & VT  
date Dec 21 98 dfrq 299.954  
solvent CDC13 dn H1  
file exp dof 0  
ACQUISITION dw nnn  
sfrq 299.955 dnm c  
tn H1 dmf 200  
at 3.641 PROCESSING  
np 32768 wtfile  
sw 4500.5 proc ft  
fb 2250 fn 32768  
bs 16  
pw 6.0 werr react  
di 1.359 wexp wft  
tof 600.0 wbs  
nt 16 wnt  
ct 16  
elock n  
gain not used  
FLAGS  
il n  
in n  
dp y  
DISPLAY  
sp -90.1  
wp 2999.5  
vs 203  
sc 0  
wc 360  
hzmm 7.89  
ls 37381.37  
rfl 571.9  
rfp 0  
tn 20  
ins 1.000  
nm ph

300 MHz-<sup>1</sup>H-NMR of Compound 3a in CDCl<sub>3</sub>

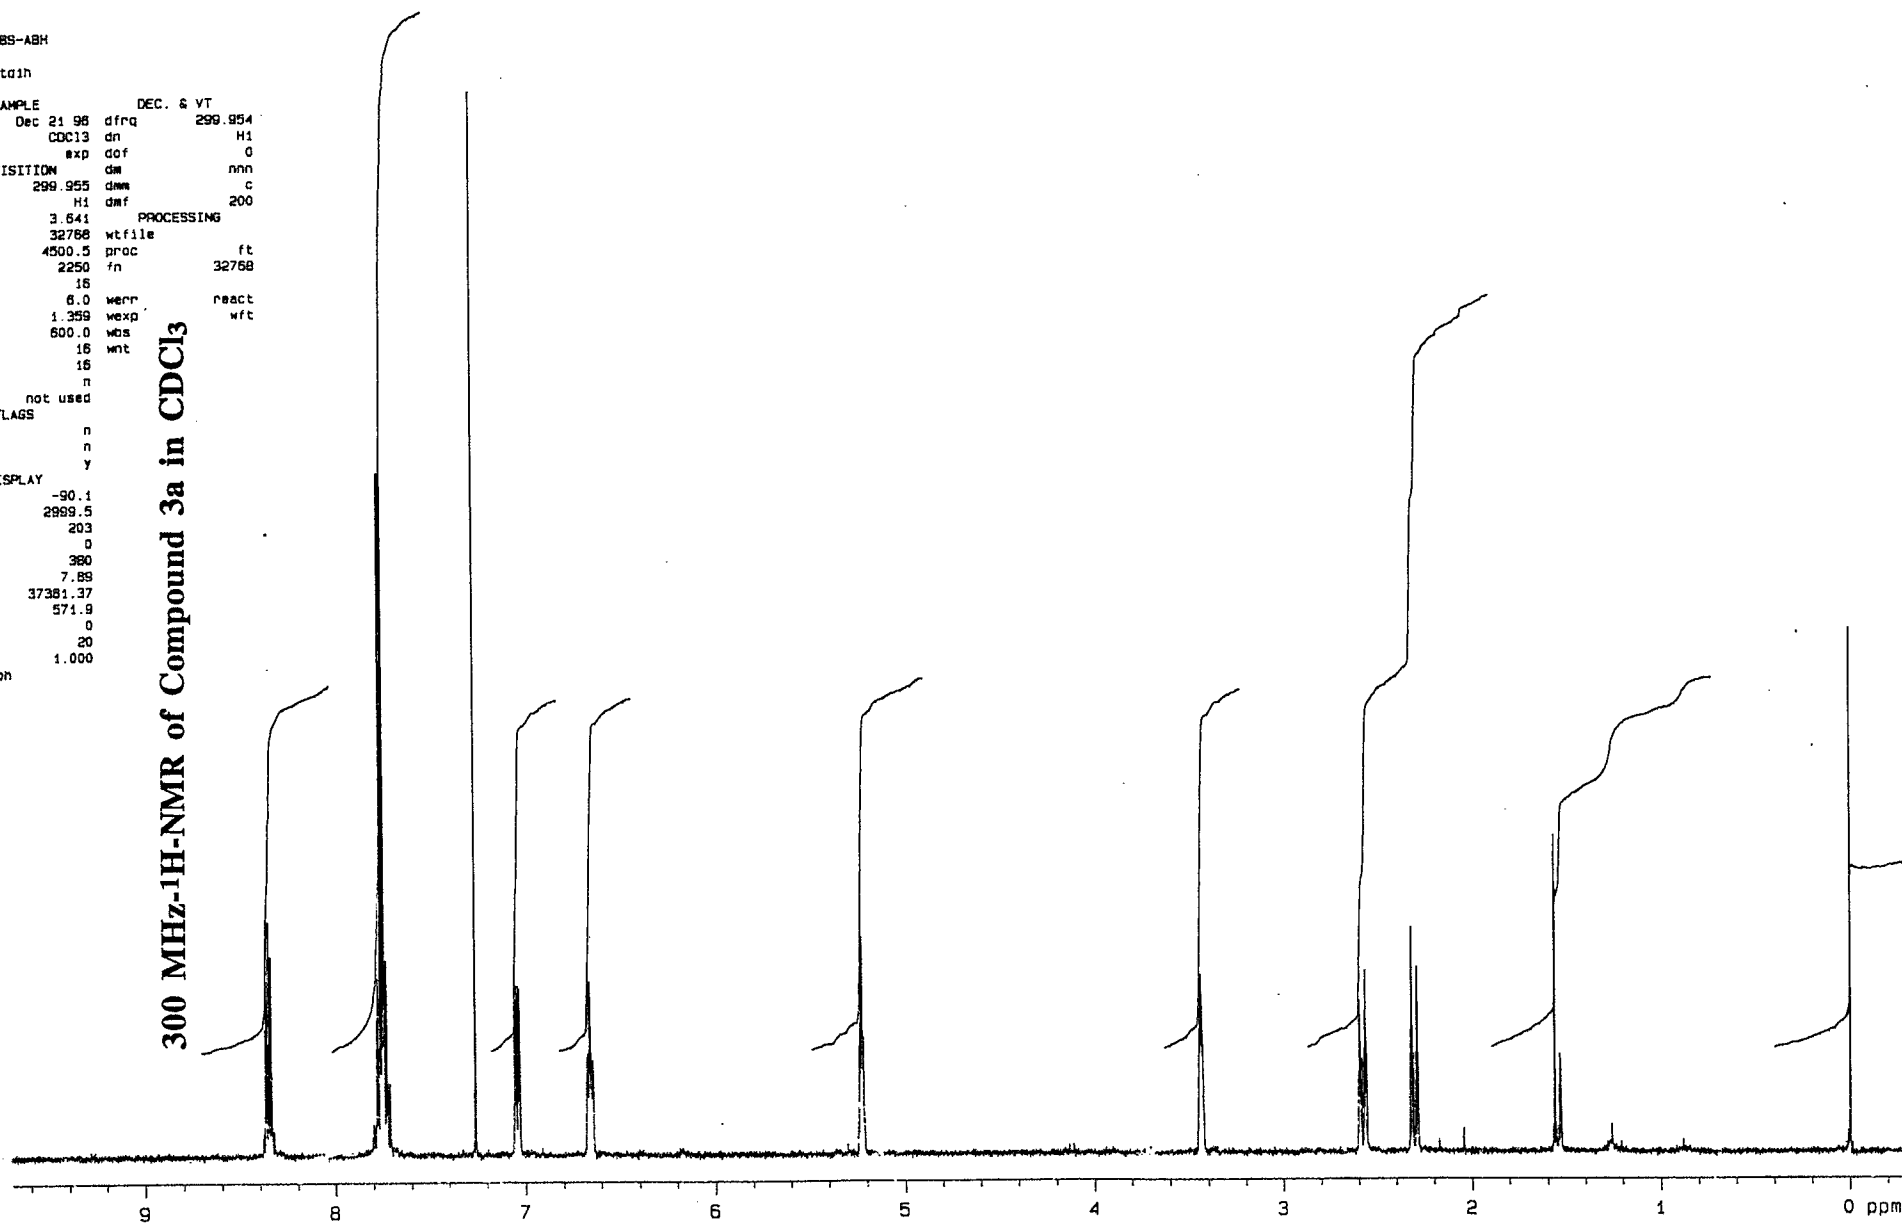

N-diphenylphosphino ABH

exp1 std1h

SAMPLE DEC. & VT  
date May 28 95 dfrq 299.954  
solvent CDCl3 dn H1  
file exp dof 0  
ACQUISITION dm nnn  
sfrq 299.955 dnm c  
tn H1 dmf 200  
at 3.641 PROCESSING  
np 32768 wtfle  
sw 4500.5 proc ft  
fb 2250 fn 32768  
bs 16  
pw 6.1 werr react  
di 1.359 wexp wft  
tof 600.0 wds  
nt 16 wnt  
ct 16  
alock n  
gain not used  
FLAGS  
il n  
in n  
dp y  
DISPLAY  
sp -572.2  
wp 4500.5  
vs 203  
sc 0  
wc 380  
hzmm 0.38  
is 12800.24  
rfl 572.2  
rfp 0  
th 20  
ins 1.000  
nm cdc pn

300 MHz-1H-NMR of Compound 3b in CDCl<sub>3</sub>

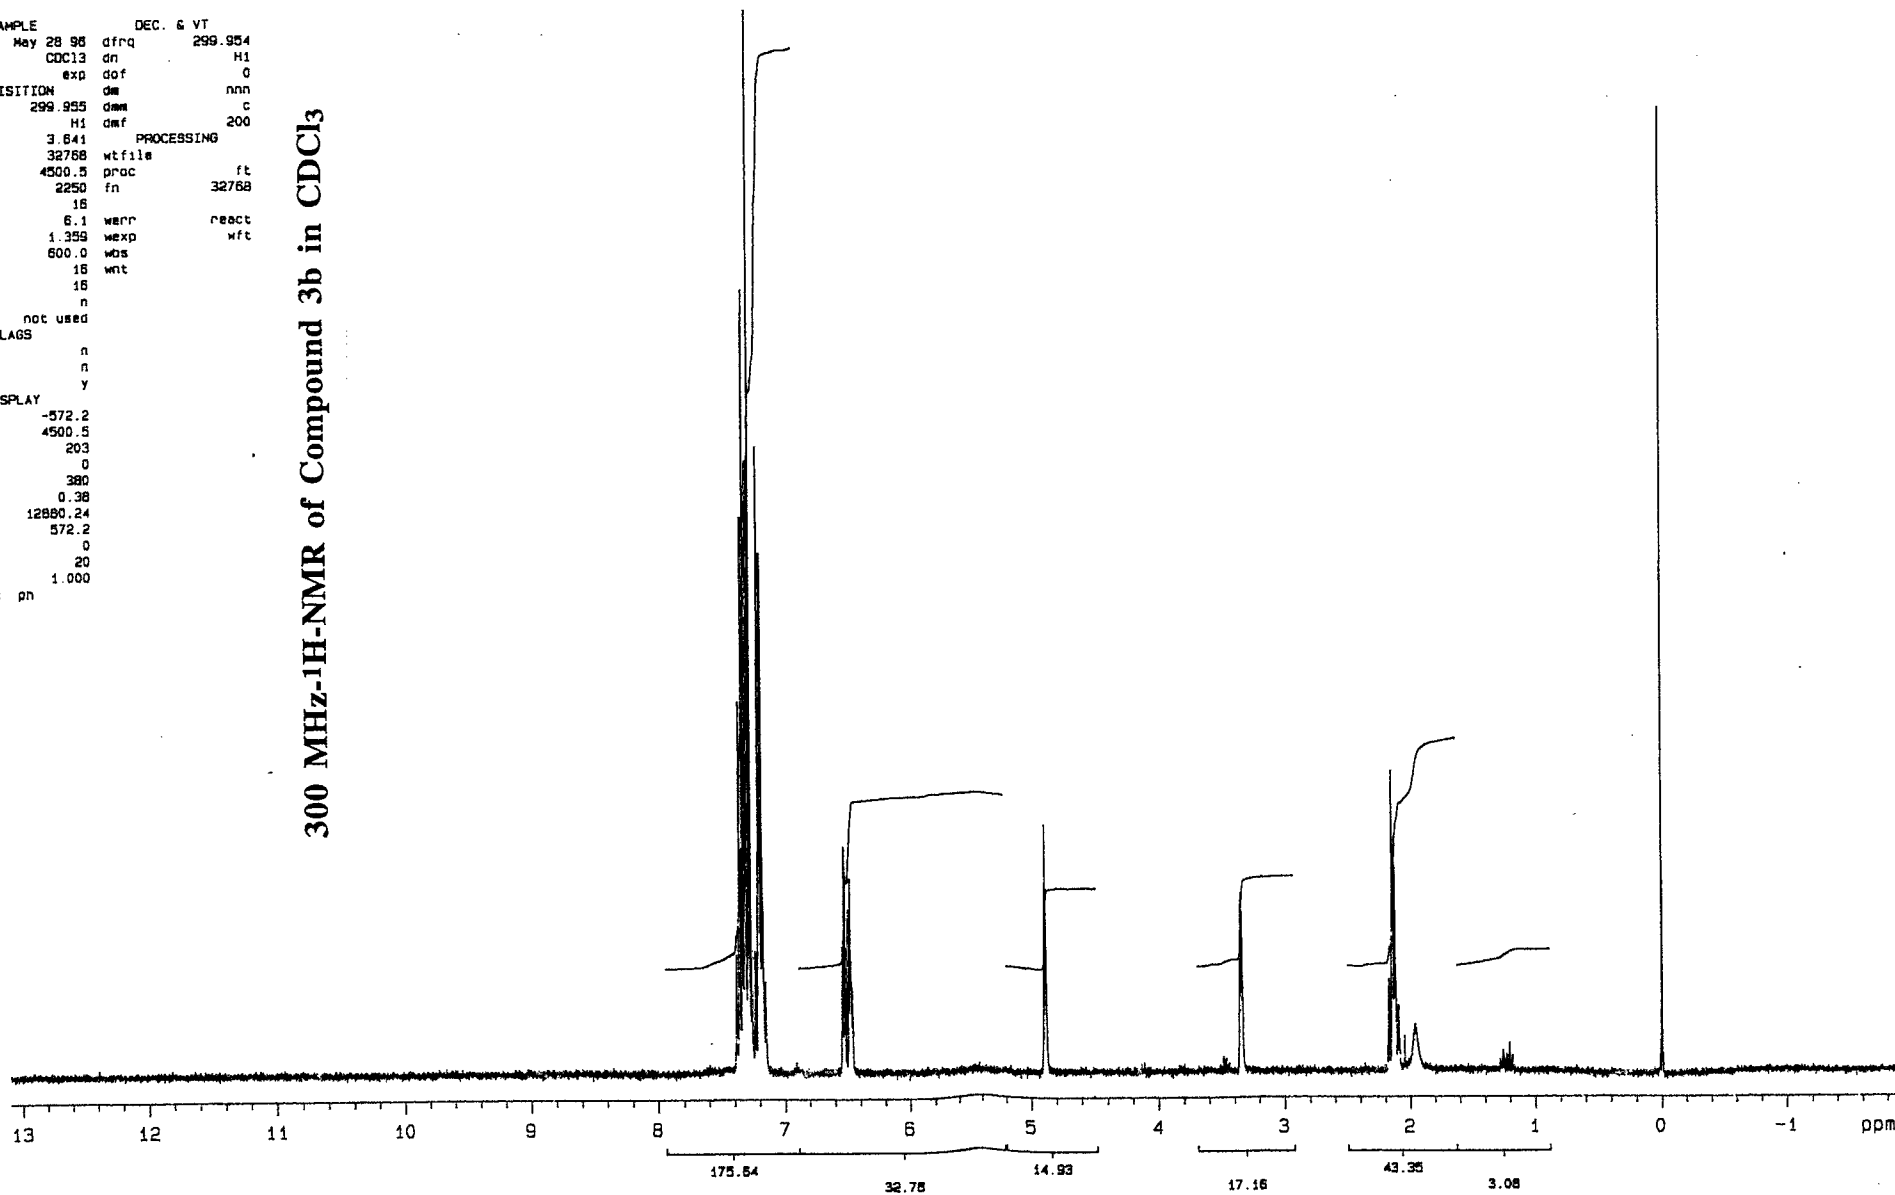

STANDARD 1H OBSERVE

expl stdih

SAMPLE DEC. & VT  
date Sep 21 96 dfrq 299.956  
solvent DMSO dn H1  
file exp dof 0  
ACQUISITION dw nnn  
sfrq 299.957 dnm c  
tn H1 dmf 200  
st 1.391 PROCESSING  
np 64000 wtfile  
sw 23000.0 proc ft  
fb 9500 fn 32768  
ds 16  
pw 8.0 werr react  
dl 1.359 wexp wft  
tof 600.0 wds  
nt 32 wnt  
ct 32  
elock n  
gain not used  
FLAGS  
il n  
in n  
op y  
DISPLAY  
sp -91.3  
wp 4498.1  
vs 203  
sc 0  
wc 380  
hzmm 11.84  
is 162001.30  
rfl 8388.3  
rfp 0  
th 20  
ins 1.000  
nm cdc ph

300 MHz-<sup>1</sup>H-NMR of Compound 6 in DMSO-d<sub>6</sub>

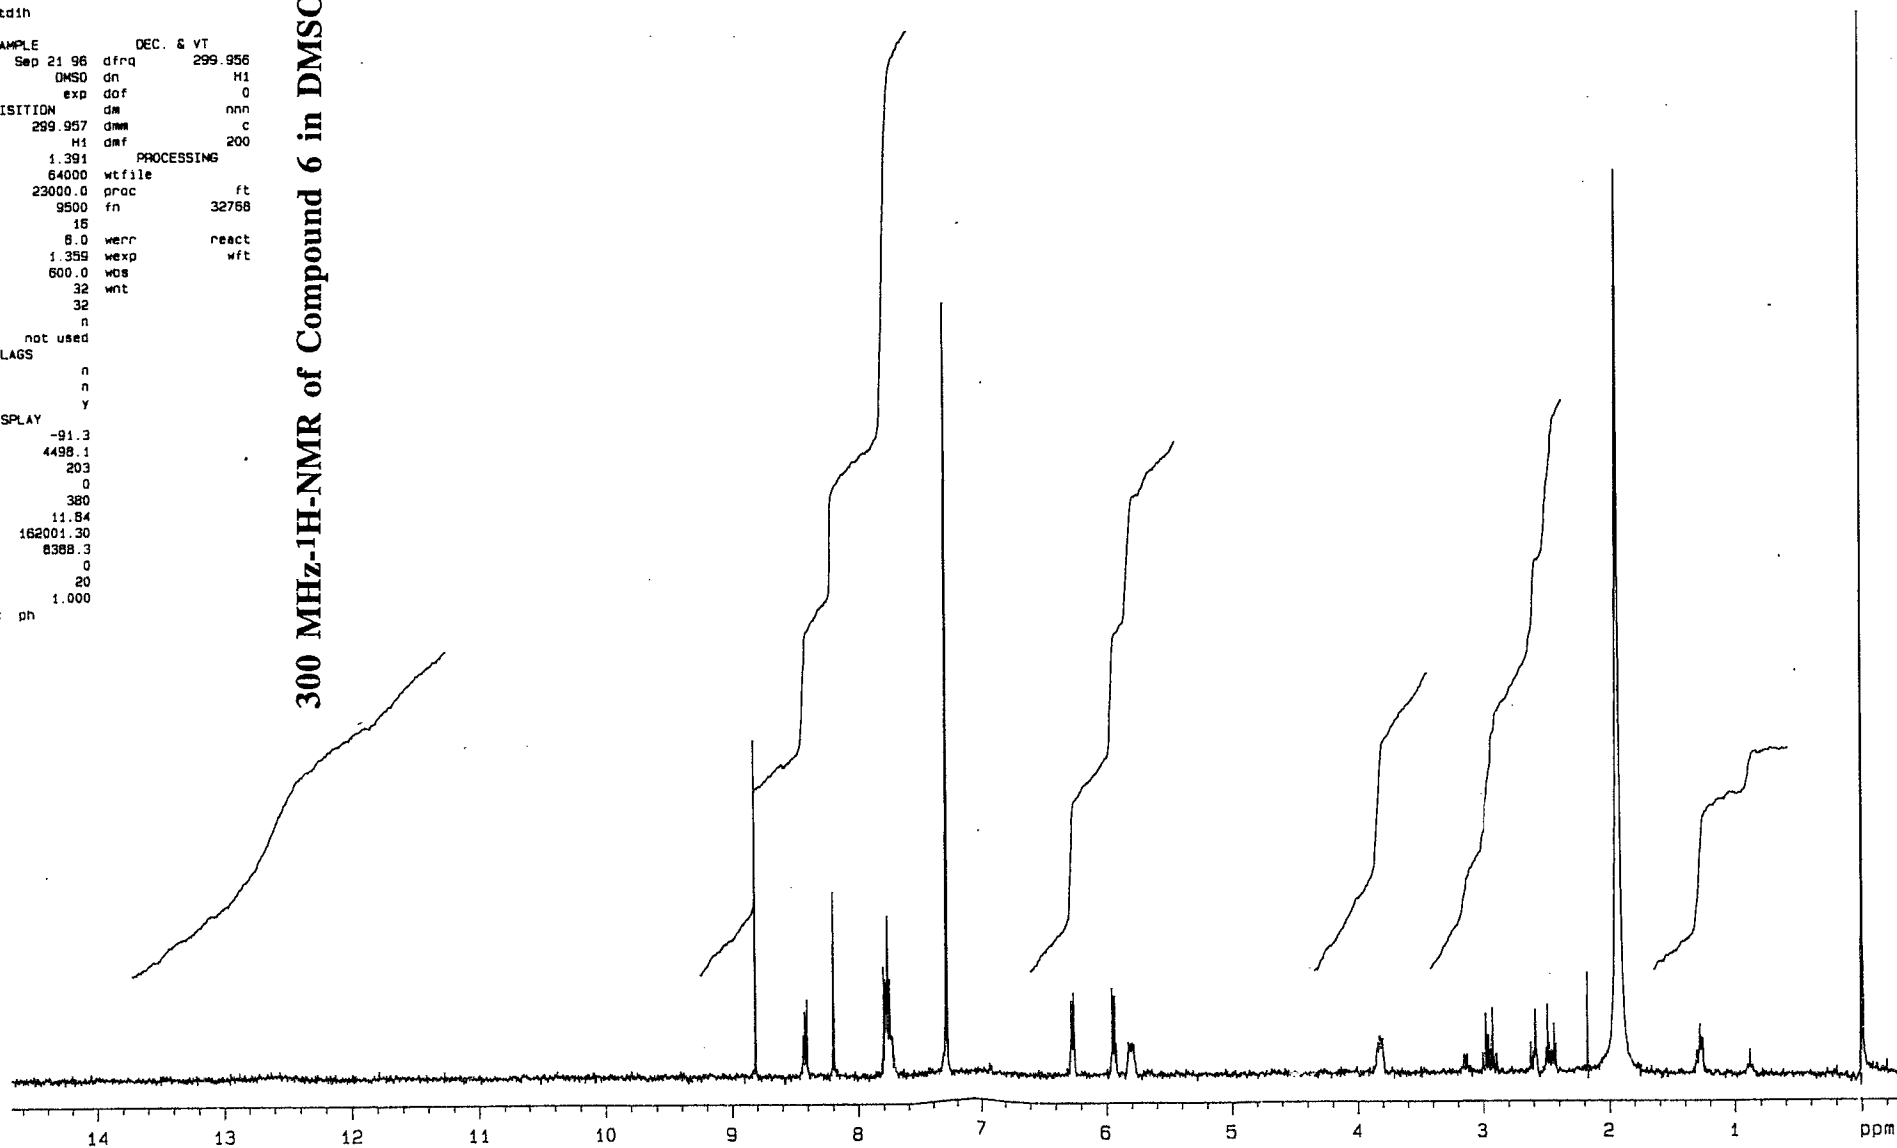



chiku phosphine-4

exp2 stdin

SAMPLE DEC. & VT  
date Jun 4 98 dfrq 299.954  
solvent CDCl3 dn H1  
file exp dof 0  
ACQUISITION dw nnn  
sfrq 299.955 dms c  
tn H1 dmf 200  
at 3.641 PROCESSING  
np 32768 wtfile /  
sw 4500.5 proc ft  
fb 2250 fn 32768  
bs 16  
pw 5.1 verr react  
di 1.359 wexp wft  
to 600.0 wds  
nt 16 wnt  
ct 16  
alock n  
gain not used  
FLAGS  
il n  
in n  
dp y  
DISPLAY  
sp -571.4  
wp 4500.5  
vs 203  
sc 0  
wc 380  
hzmm 15.79  
is 14812.55  
rfl 571.4  
rfp 0  
th 20  
ins 1.000  
nm cdc ph

300 MHz-<sup>1</sup>H-NMR of Compound 7 in CDCl<sub>3</sub>

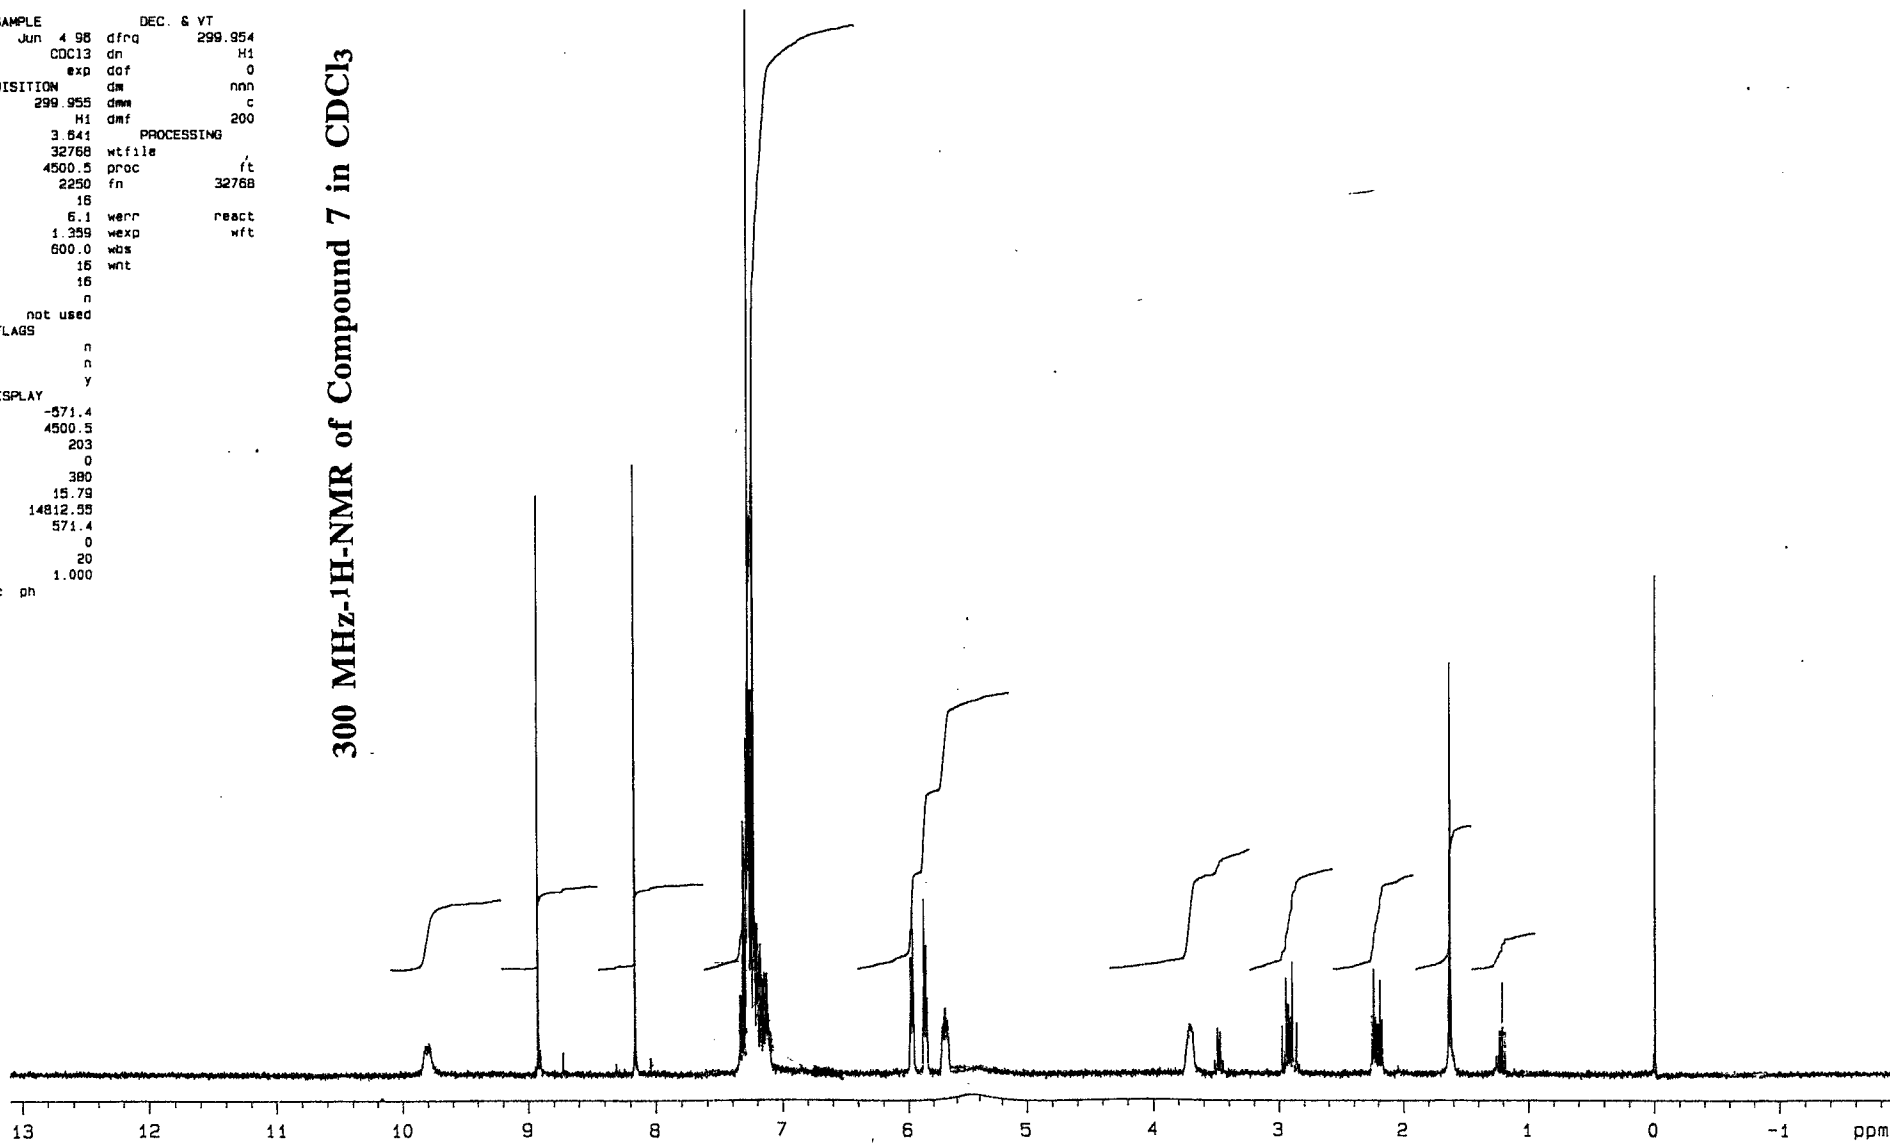

# 300 MHz-<sup>1</sup>H-NMR of Compound 8 in DMSO-d<sub>6</sub>

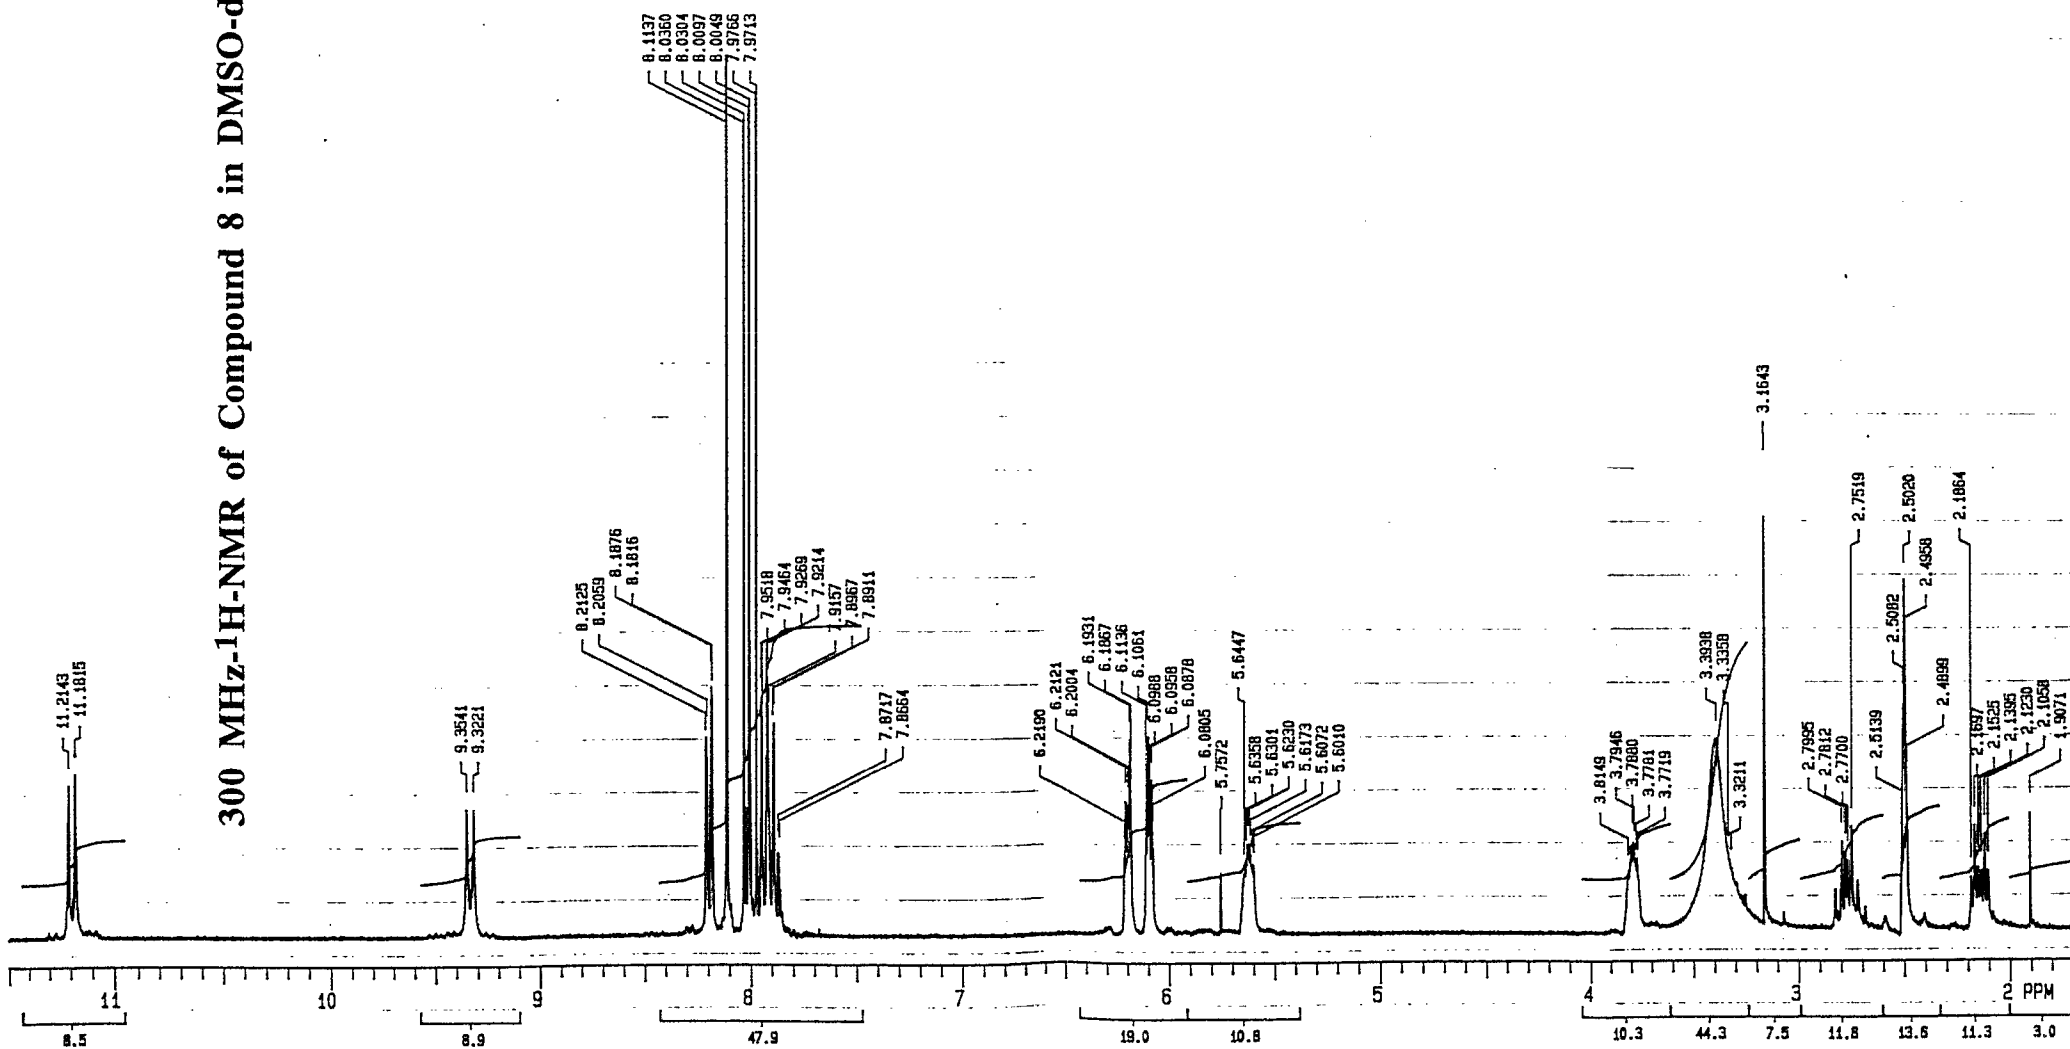

OBSERVE  
Nucleus 1.000  
Spec. Width 500.5 Hz  
Acq. Time 2.993 sec  
Pulse Width 9.6 μsec  
Freq. 300 MHz  
Offset 0 Hz  
Delay 0.222 sec  
Transients 16

DECOUPLE  
Nucleus 1.000  
Mode HNN  
Modulation Mode C  
Pulse Width μsec  
Offset -450.0 Hz  
Power 1400.0 db  
Freq. 200 Hz  
Power Mode 1.0

PLOT/PROCESSING  
F1 32 K RE sec CO sec  
L1 He AF sec CCD  
Width 2948.9 Hz/ppm Start 502.2 Hz/ppm  
Reference

EXPERIMENT  
Pulse Sequence SPUL  
Tube O.D. mm  
Temp. °C  
Solvent DMSO

SAMPLE  
EXP7241  
FACP - ABH-NES  
MAIN PRODUCT

Number  
File H  
Date 01-31-95  
18:42:23  
XL-500 300

10  
300 MHz-<sup>1</sup>H-NMR of Compound 10 in DMSO-d<sub>6</sub>

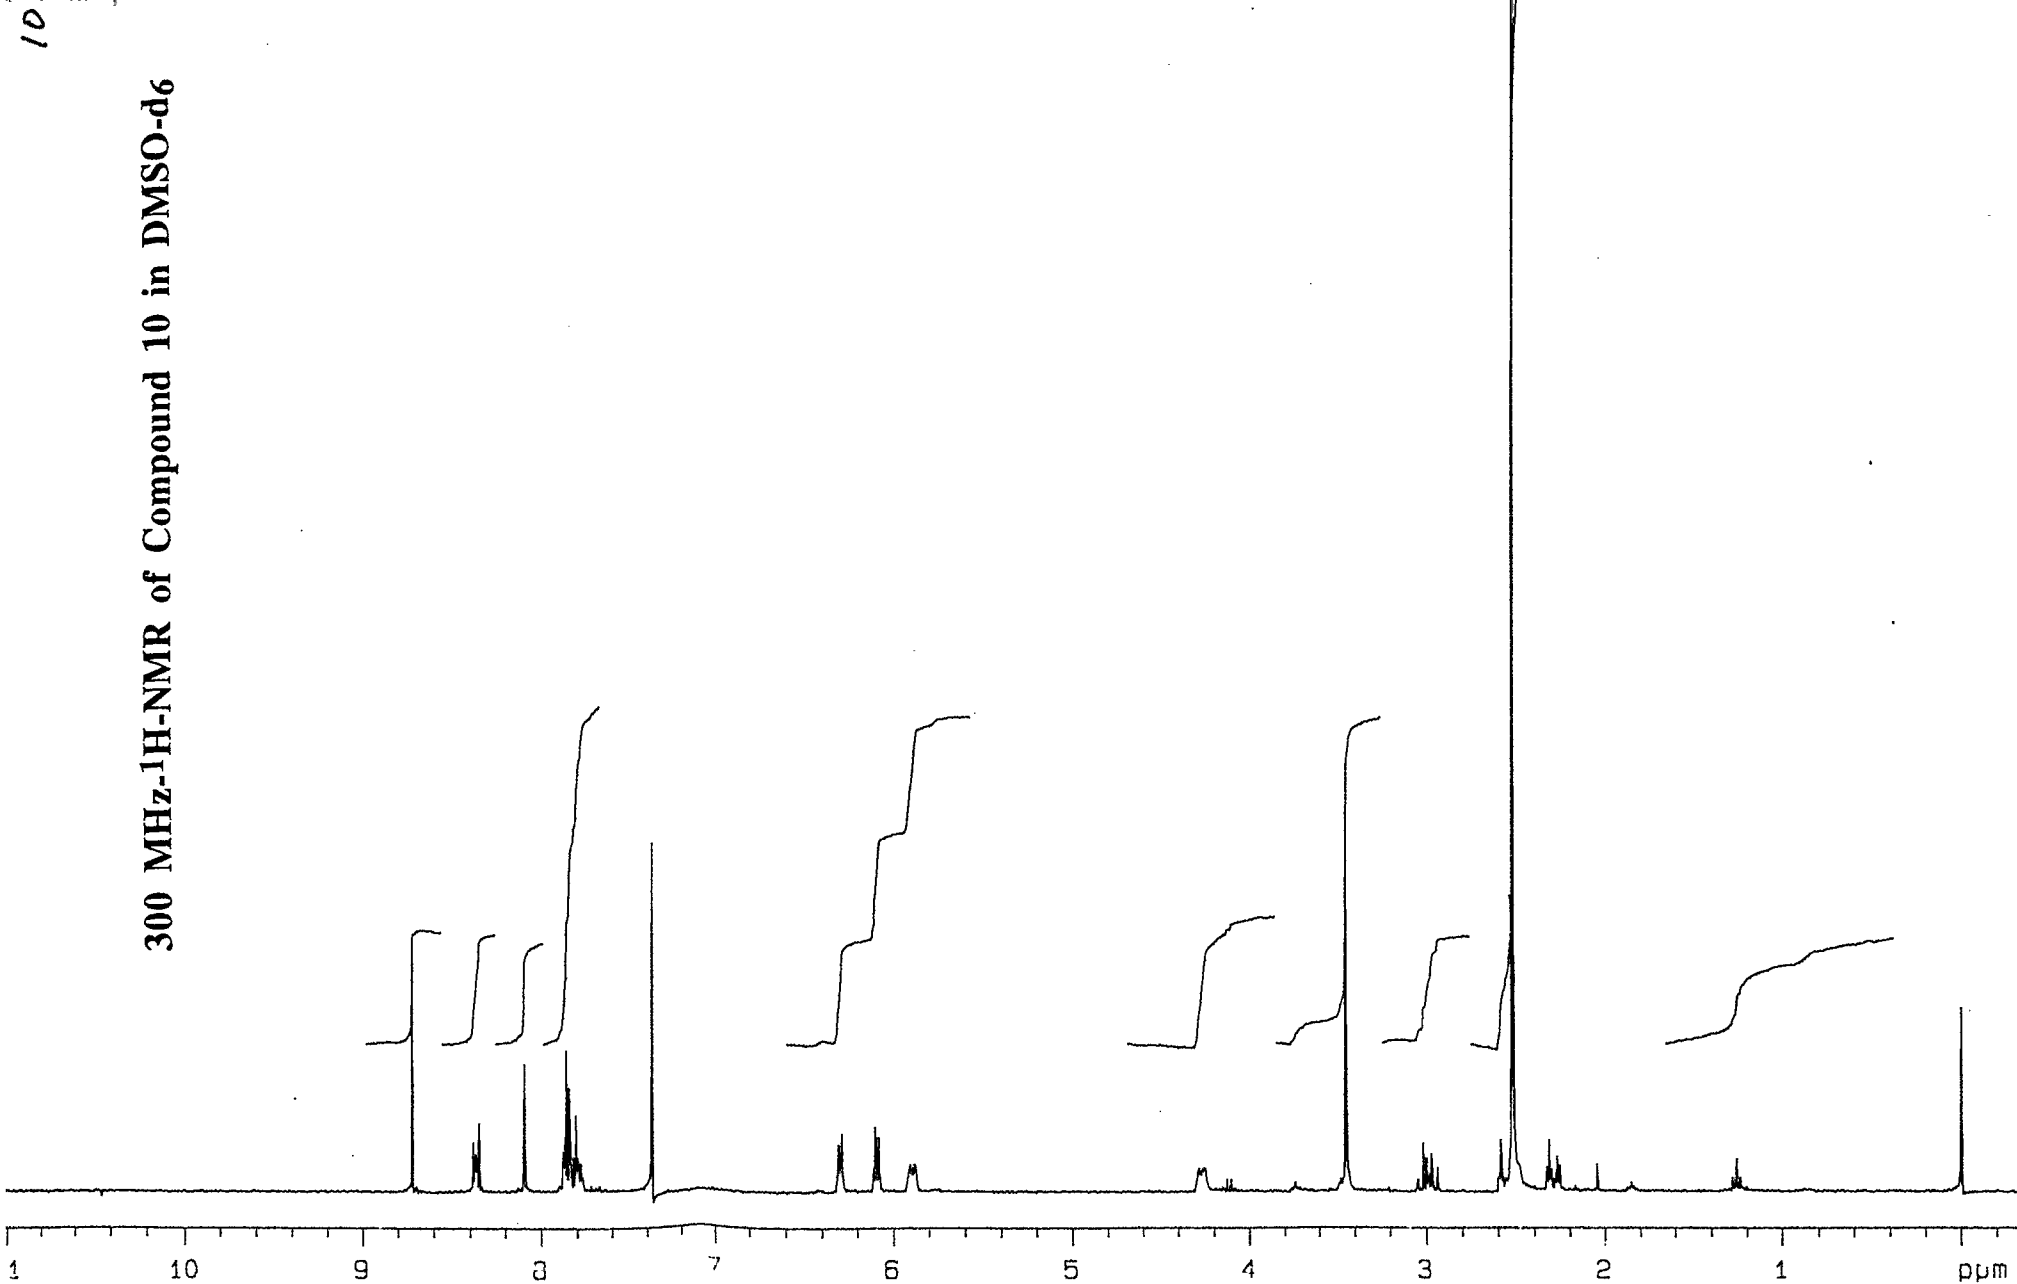

11

300 MHz-<sup>1</sup>H-NMR of Compound 11 in CDCl<sub>3</sub>

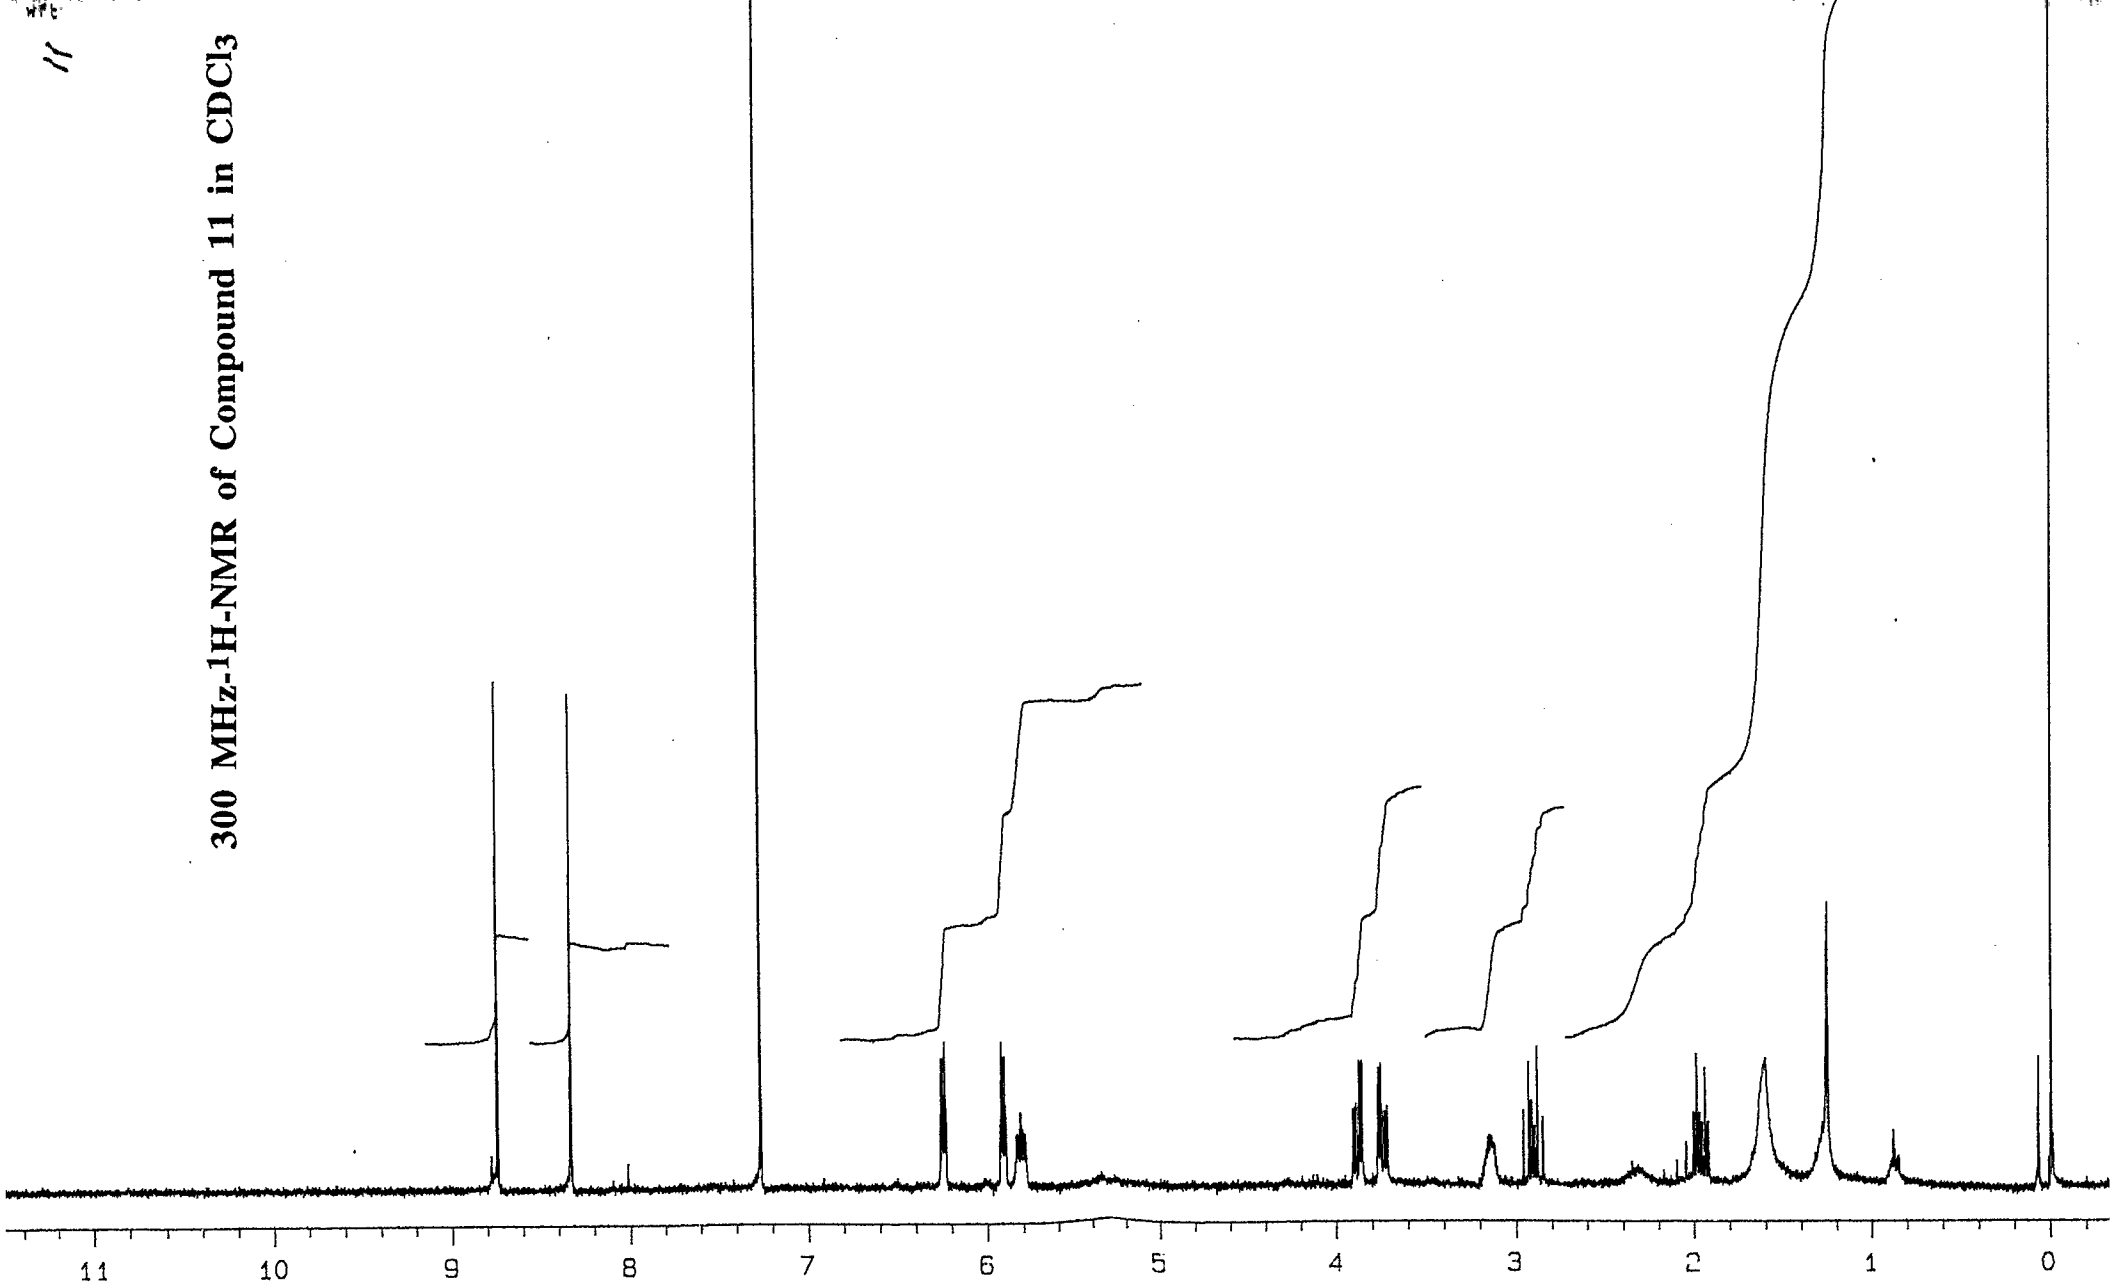

300 MHz-<sup>1</sup>H-NMR of Compound 13 in DMSO-d<sub>6</sub>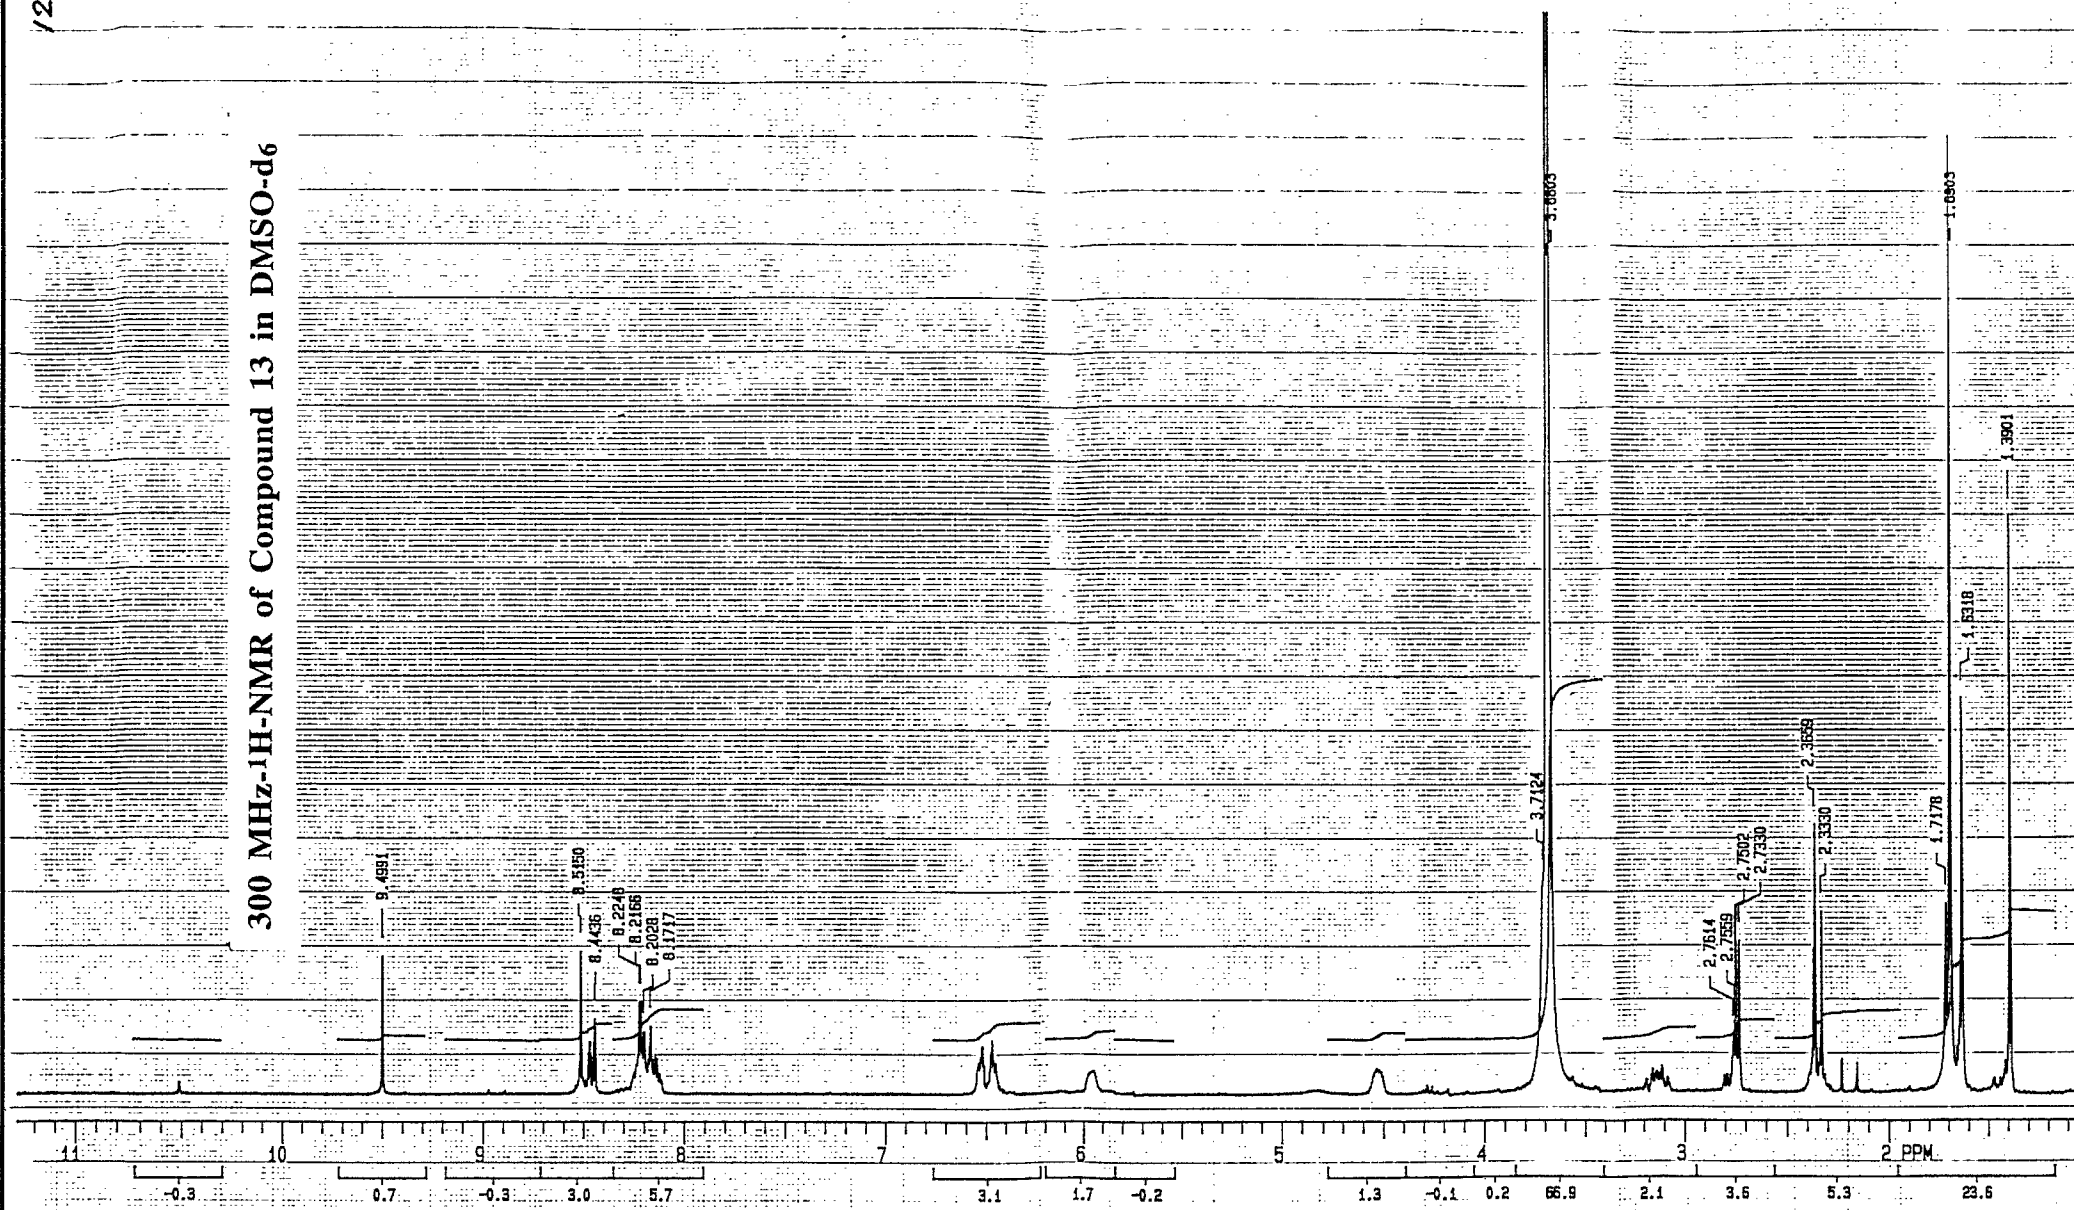

OBSERVE  
Nucleus 1.000 Freq. 300 MHz  
Spec. Width 1500.5 Hz Offset 0 Hz  
Acq. Time 2.993 sec Delay 0.222 sec  
Pulse Width 9.6  $\mu$ sec Transients 15

DECOUPLE  
Nucleus 1.000 Offset -450.0 Hz  
Mode NNH Power 1400.0 db  
Modulation Mode C Freq. 200 Hz  
Pulse Width         $\mu$ sec Power Mode 1.0

PLOT/PROCESSING  
FN 32 K RE        sec CD        sec  
LB        Hz AF        sec CCD         
Width 2086.8 Hz/ppm Start 300.2 Hz/ppm  
Reference       

EXPERIMENT  
Pulse Sequence CPUL  
Tube O.D.        mm  
Temp.        °C  
Solvent DMSO

SAMPLE  
EXP7640  
N-BOC-N-HE

Number         
File H  
Date 01-07-96  
16:53:43  
XL 65M 300

300 MHz-<sup>1</sup>H-NMR of Compound 15 in DMSO-d<sub>6</sub>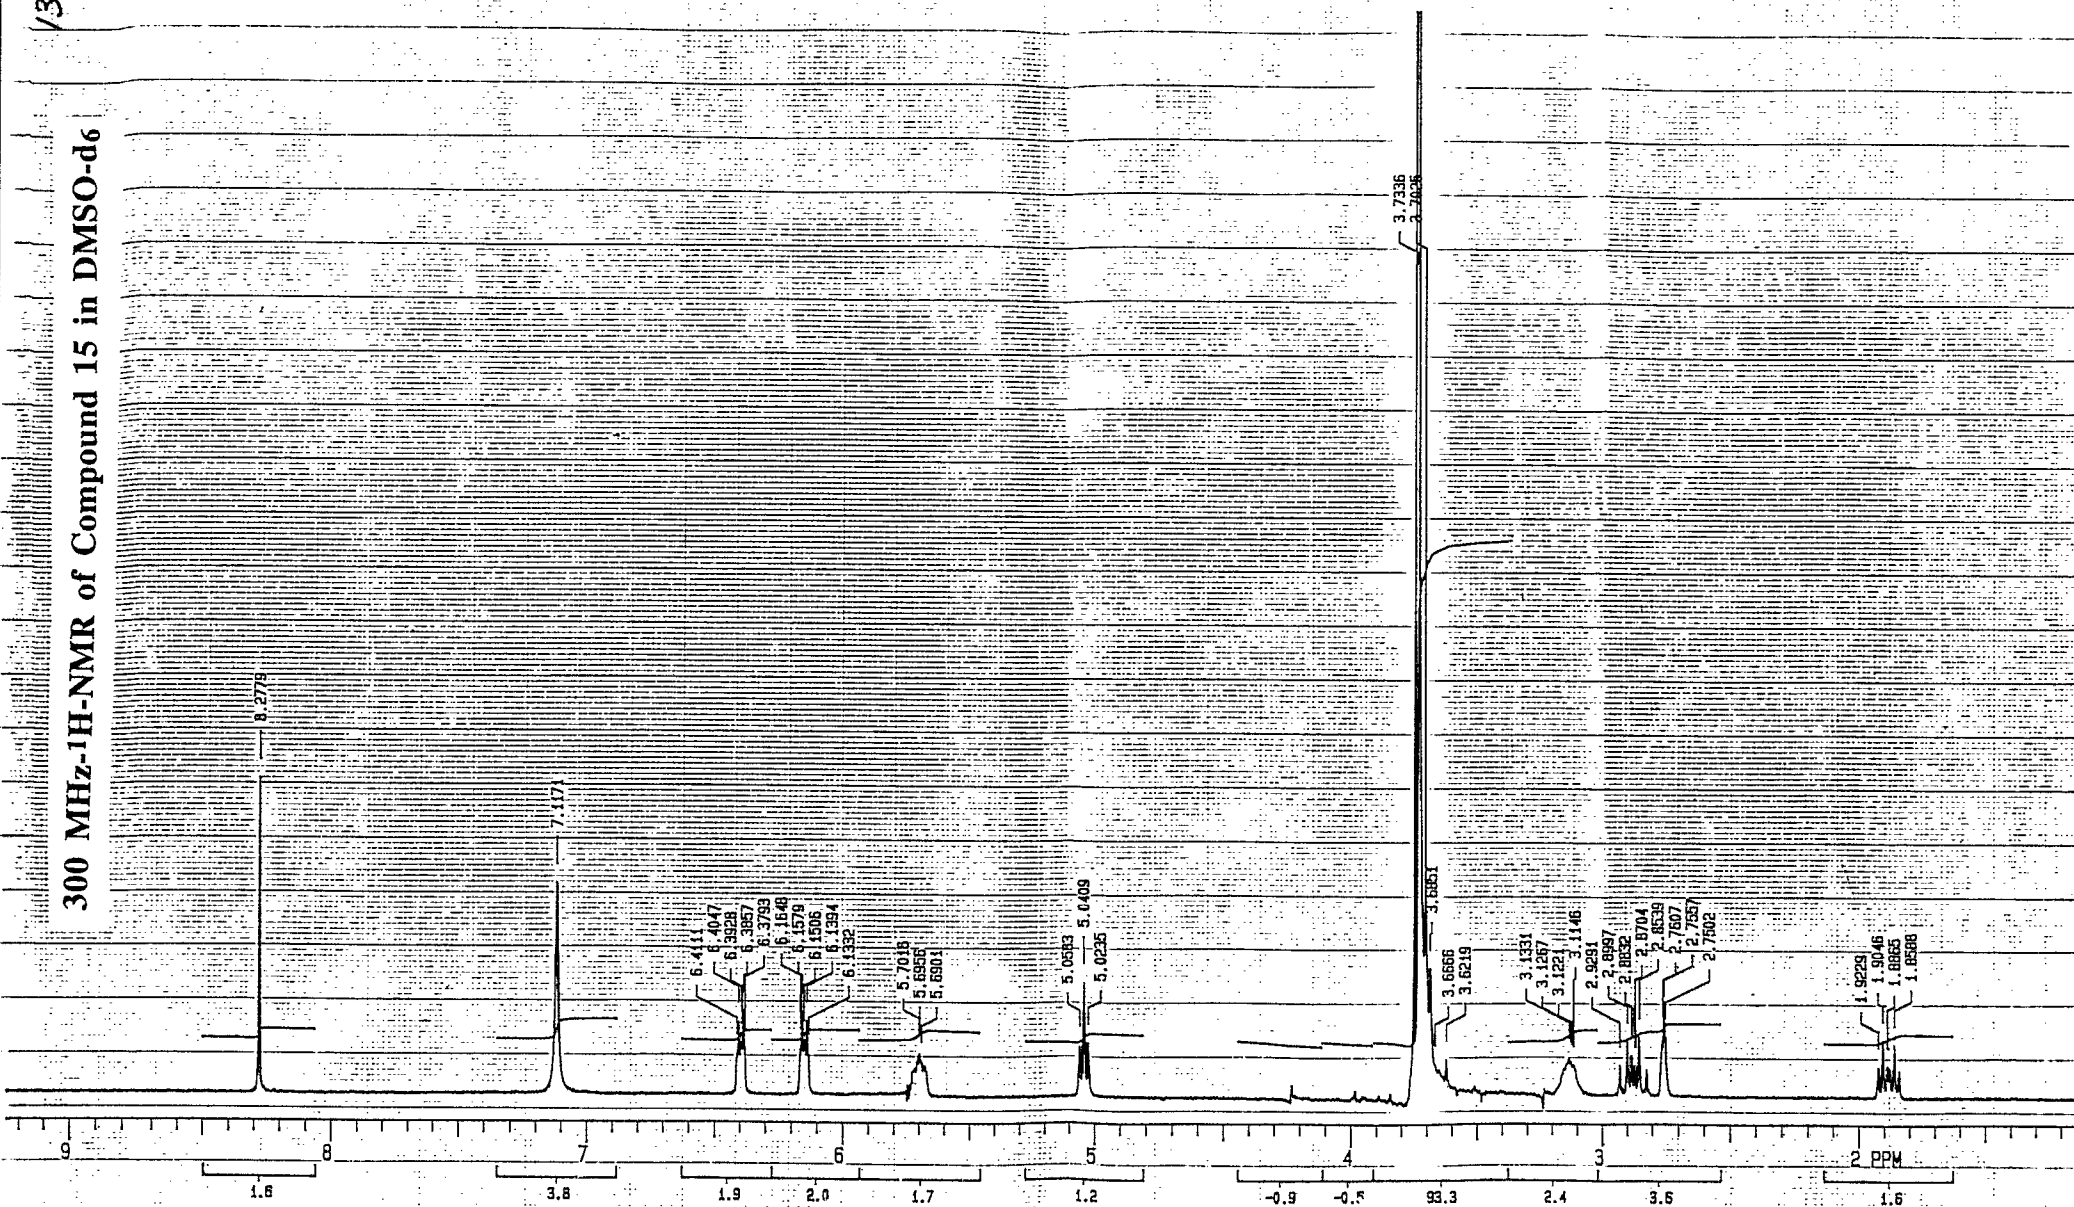

Nucleus 1.000 Freq. 300 MHz  
 Spec. Width 1500.5 Hz Offset 0 Hz  
 Acq. Time 2.993 sec Delay 0.222 sec  
 Pulse Width 9.6  $\mu$ sec Transients 16

Nucleus 1.000 Offset -450.0 %  
 Mode HNH Power 1400.0 db  
 Module/Mode C Freq. 200 Hz  
 Pulse Width 9.6  $\mu$ sec Power Mode 1.0

## PLOT/PROCESSING

FN 32 K RE     sec CD     sec  
 LB     Hz AF     sec CCD      
 Width 2435.5 Hz/ppm Start 339.8 Hz/ppm  
 Reference    

## EXPERIMENT

Pulse Sequence CPUL  
 Tube O.D.     mm  
 Temp.     °C  
 Solvent DMSO

SAMPLE  
 ACPA 15MG

Number      
 File H  
 Date 02-07-96  
 01:17:44  
 XL 85M 300
